# Supplementary material for: C3N4-sensitized TiO2 nanotube arrays with enhanced visible-light photoelectrochemical performance
Source: Royal Society of Chemistry journal article supplement (doi:10.1039/c5cp01580d), 2015-01-01
Supplement: c5cp01580d1.pdf [file c5cp01580d1.pdf]

## **C<sub>3</sub>N<sub>4</sub>-sensitized TiO<sub>2</sub> nanotube arrays with enhanced visible-light photoelectrochemical performance**

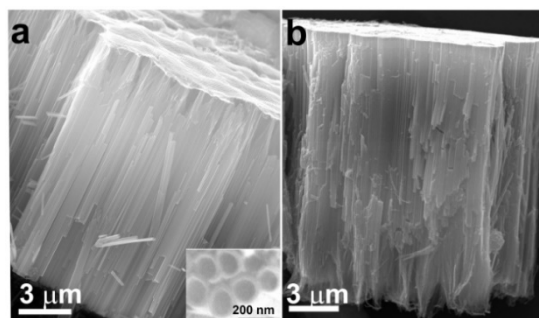

**Fig. S1** (a) Scanning electron microscopy (SEM) image of TiO<sub>2</sub> NTs. (b) SEM image of C<sub>3</sub>N<sub>4</sub>/TiO<sub>2</sub> NTs.

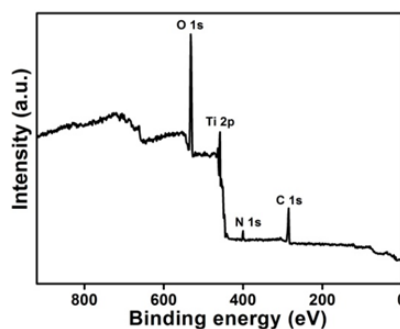

**Fig. S2** X-ray photoelectron spectra (XPS) full survey spectrum of C<sub>3</sub>N<sub>4</sub>/TiO<sub>2</sub> NTs.

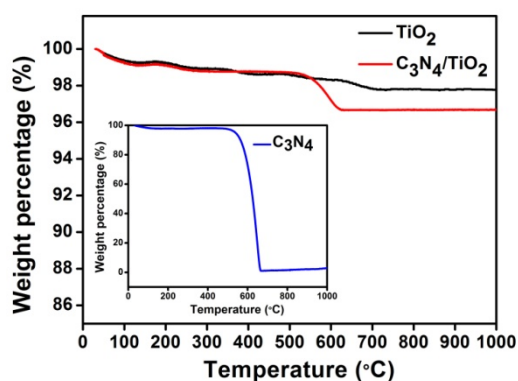

**Fig. S3** TGA curves of TiO<sub>2</sub> NTs, C<sub>3</sub>N<sub>4</sub> (the inset) and C<sub>3</sub>N<sub>4</sub>/TiO<sub>2</sub> NTs.

The Faradaic efficiency was calculated using the following equation:

$$\text{Faradaic efficiency} = \frac{\text{Evolved hydrogen [mol]} \times 2 \times N_A}{\text{current density [Acm}^{-2}] \times \text{Time[S]} \times \text{Active area of photoanode [cm}^2] \times e} \times 100\%$$

Where,  $N_A$  is avogadro's number,  $e$  is the electron charge.
